# Supplementary material for: Impact of ACA Health Reforms for People With Mental Health Conditions
Source: Atypon-hosted journal article supplement (doi:10.1176/appi.ps.201700044), 2017-11-15
Supplement: appi.ps.201700044.ds001.pdf [file appi.ps.201700044.ds001.pdf]

SUPPLEMENTAL TABLE. Characteristics of people with mental health conditions surveyed pre- and post-implementation of the Affordable Care Act and by state Medicaid expansion status<sup>a</sup>

| Characteristic                                  | Pre-ACA<br>(N=1,550) |    | Post-ACA                      |    |                                  |    | P <sup>b</sup> |
|-------------------------------------------------|----------------------|----|-------------------------------|----|----------------------------------|----|----------------|
|                                                 | N                    | %  | Medicaid expansion<br>(N=774) |    | No Medicaid expansion<br>(N=665) |    |                |
|                                                 | N                    | %  | N                             | %  | N                                | %  |                |
| Age (years)                                     |                      |    |                               |    |                                  |    |                |
| 18–24                                           | 247                  | 16 | 139                           | 18 | 97                               | 15 | .198           |
| 25–34                                           | 308                  | 20 | 170                           | 22 | 156                              | 24 | .558           |
| 35–44                                           | 299                  | 19 | 151                           | 20 | 141                              | 21 | .413           |
| 45–54                                           | 367                  | 24 | 164                           | 21 | 144                              | 22 | .855           |
| 55–64                                           | 328                  | 21 | 150                           | 19 | 126                              | 19 | .868           |
| Female                                          | 949                  | 61 | 481                           | 62 | 387                              | 58 | .341           |
| Race and ethnicity                              |                      |    |                               |    |                                  |    |                |
| White, non-Hispanic                             | 1,132                | 73 | 541                           | 70 | 456                              | 69 | .849           |
| Black, non-Hispanic                             | 145                  | 10 | 53                            | 9  | 72                               | 15 | .024           |
| Other, non-Hispanic                             | 103                  | 6  | 55                            | 9  | 33                               | 5  | .037           |
| Hispanic                                        | 170                  | 11 | 105                           | 14 | 79                               | 12 | .815           |
| Married                                         | 687                  | 44 | 311                           | 40 | 276                              | 42 | .638           |
| Education                                       |                      |    |                               |    |                                  |    |                |
| High school or less                             | 638                  | 41 | 337                           | 44 | 311                              | 47 | .273           |
| Some college                                    | 513                  | 33 | 243                           | 31 | 194                              | 29 | .454           |
| College graduate                                | 399                  | 26 | 195                           | 25 | 160                              | 24 | .638           |
| Family income                                   |                      |    |                               |    |                                  |    |                |
| ≤138% federal poverty level                     | 562                  | 36 | 308                           | 40 | 285                              | 43 | .430           |
| 139%–399% federal poverty level                 | 540                  | 35 | 261                           | 34 | 241                              | 36 | .463           |
| ≥400% federal poverty level                     | 448                  | 29 | 205                           | 26 | 139                              | 21 | .070           |
| Health status                                   |                      |    |                               |    |                                  |    |                |
| Self-report fair or poor <u>health</u>          | 361                  | 23 | 205                           | 27 | 204                              | 31 | .220           |
| Has an impairment or disability <sup>c</sup>    |                      |    | 193                           | 25 | 155                              | 23 | .524           |
| Poor mental health, at least 20 of past 30 days | 341                  | 22 | 197                           | 26 | 184                              | 28 | .463           |
| Lives in metro area                             | 1,295                | 84 | 657                           | 85 | 541                              | 81 | .448           |
| Region                                          |                      |    |                               |    |                                  |    |                |
| Northeast                                       | 257                  | 17 | 191                           | 25 | 68                               | 10 | .334           |
| Midwest                                         | 419                  | 27 | 221                           | 29 | 133                              | 20 | .577           |
| South                                           | 527                  | 34 | 99                            | 13 | 427                              | 64 | .001           |
| West                                            | 348                  | 22 | 263                           | 34 | 37                               | 6  | .058           |
| Health insurance coverage                       |                      |    |                               |    |                                  |    |                |
| Employer-sponsored insurance                    | 822                  | 53 | 373                           | 48 | 327                              | 49 | .759           |
| Directly purchased coverage                     | 108                  | 7  | 42                            | 5  | 55                               | 8  | .058           |
| Medicaid                                        | 180                  | 12 | 202                           | 26 | 117                              | 18 | .004           |

|                                                 |       |    |     |    |     |    |      |
|-------------------------------------------------|-------|----|-----|----|-----|----|------|
| Uninsured all year                              | 179   | 12 | 27  | 4  | 48  | 7  | .073 |
| Access to care                                  |       |    |     |    |     |    |      |
| Has a usual source of care                      | 1,200 | 77 | 639 | 83 | 543 | 82 | .700 |
| Unmet need for care: unaffordable               | 759   | 49 | 339 | 44 | 321 | 48 | .092 |
| Unmet need for mental health care: unaffordable | 311   | 20 | 129 | 17 | 115 | 17 | .745 |
| Employed at time of survey                      | 851   | 55 | 414 | 54 | 373 | 56 | .398 |

<sup>a</sup> ACA, Affordable Care Act. Sample for pre-ACA implementation was surveyed in 2013; sample for post-ACA implementation was surveyed in 2016.

<sup>b</sup> p-value for difference between Medicaid expansion and non-expansion states was based on two-tailed Fisher's exact test.

<sup>c</sup> Data were not available in 2013
